## Index to Volume 46

---

### Articles

- Bakun, Andrew, and Parrish, Richard H.** Comparative studies of coastal pelagic fish reproductive habitats: the Brazilian sardine (*Sardinella aurita*) ..... 269
- Clay, Douglas.** Oogenesis and fecundity of haddock (*Melanogrammus aeglefinus* L.) from the Nova Scotia shelf ..... 24
- Falk-Petersen, I. B., Haug, T., and Moksness, E.** Observations on the occurrence, size, and feeding of pelagic larvae of the common wolffish (*Anarhichas lupus*) in western Finnmark, northern Norway ..... 148
- Foote, Kenneth, G.** Designing an improved transducer array geometry ..... 129
- Foote, Kenneth, G.** Spheres for calibrating an eleven-frequency acoustic measurement system ..... 284
- Gauld, James A.** Movements of lesser sandeels (*Ammodytes marinus* Raitt) tagged in the northwestern North Sea ..... 229
- Godø, Olav Rune.** A review of the natural history, fisheries, and management of Greenland halibut (*Reinhardtius hippoglossoides*) in the eastern Norwegian and Barents Seas ..... 62
- Hankin, D. G., Diamond, N., Mohr, M. S., and Ianelli, J.** Growth and reproductive dynamics of adult female Dungeness crabs (*Cancer magister*) in northern California ..... 94
- Hatfield, E. M. C., Rodhouse, P. G., and Porebski, J.** Demography and distribution of the Patagonian squid (*Loligo gahi* d'Orbigny) during the austral winter ..... 306
- Hill, A. E., and White, R. G.** The dynamics of Norway lobster (*Nephrops norvegicus* L.) populations on isolated mud patches ..... 167
- Holliday, D. V., Pieper, R. E., and Kleppel, G. S.** Determination of zooplankton size and distribution with multifrequency acoustic technology ..... 52
- Jensen, A. L.** Linearization with ordinary least-squares estimation, and nonlinear estimation of mortality using the catch equation ..... 175
- Jones, R.** Length-cohort analysis: The importance of choosing the correct growth parameters ..... 133
- Jørgensen, Terje.** Long-term changes in age at sexual maturity of Northeast Arctic cod (*Gadus morhua* L.) ..... 235
- MacKenzie, K.** Cestode parasites as biological tags for mackerel (*Scomber scombrus* L.) in the Northeast Atlantic ..... 155
- Martin, I., and Cook, R. M.** Combined analysis of length and age-at-length data ... 178
- Mayo, R. K., Burnett, J., Smith, T. D., and Muchant, C. A.** Growth-maturation interactions of Acadian redfish (*Sebastes fasciatus* Storer) in the Gulf of Maine-Georges Bank region of the Northwest Atlantic ..... 287
- Maller, R. A.** Some aspects of a mixture model for estimating the boundary of a set of data ..... 140
- Möller, H.** Association between diseases of flounder (*Platichthys flesus*) and environmental conditions in the Elbe estuary, FRG ..... 187
- Nedreaas, Kjell, and Nævdal, Gunnar.** Studies of Northeast Atlantic species of redfish (genus *Sebastes*) by protein polymorphism ..... 76
- Paul, A. J., Paul, J. M., and Smith, R. L.** Energy ingestion and conversion rate in pollock (*Theragra chalcogramma*) fed different prey types ..... 232
- Potter, D. C., Lough, R. G., Perry, R. I., and Neilson, J. D.** Comparison of the MOCNESS and IYGPT pelagic samplers for the capture of 0-group cod (*Gadus morhua*) on Georges Bank ..... 121
- Rankine, Paul W., Cargill, Lindsay H., and Morrison, John A.** Variation in the hatching length of spring-spawned herring larvae (*Clupea harengus* L.) on Ballantrae Bank in the Firth of Clyde ..... 333

|                                                                                                                                                                                          |          |
|------------------------------------------------------------------------------------------------------------------------------------------------------------------------------------------|----------|
| <b>Revie, J., Weston, D. E., Harden Jones, F. R., and Fox, G. P.</b> Identification of fish echoes located at 65 km range by shore-based sonar .....                                     | 313      |
| <b>Rijnsdorp, A. D.</b> Maturation of male and female North Sea plaice ( <i>Pleuronectes platessa</i> L.) .....                                                                          | 35       |
| <b>Sampson, David B.</b> A length-structured population model for southern fin whales and a test for density dependence .....                                                            | 249      |
| <b>Sparholt, Henrik.</b> An estimate of the total biomass of fish in the North Sea .....                                                                                                 | 200      |
| <b>Sparholt, Henrik.</b> Improved estimates of the natural mortality rates of nine commercially important fish species included in the North Sea multispecies VPA model .....            | 211      |
| <b>Sparholt, Henrik.</b> A stochastic integrated VPA for herring in the Baltic Sea using acoustic estimates as auxiliary information for estimating natural mortality .....              | 325      |
| <b>Stergiou, K. I.</b> Modelling and forecasting the fishery for pilchard ( <i>Sardina pilchardus</i> ) in Greek waters using ARIMA time-series models .....                             | 16       |
| <b>Sætersdal, Gunnar.</b> Fish resources research and fishery management: A review of nearly a century of experience in the Northeast Atlantic and some recent global perspectives ..... | 5        |
| <b>Vøllestad, Leif Asbjørn.</b> Optimal management of European eel in the Imsa River, Norway .....                                                                                       | 115      |
| <br><b>Short Note</b>                                                                                                                                                                    |          |
| <b>Solarin, B. B.</b> Mesh selectivity of monofilament (polyamide) gillnets for the bonga ( <i>Ethmalosa fimbriata</i> ) in Lagos Lagoon, Nigeria .....                                  | 109      |
| <br><b>Reviews</b> .....                                                                                                                                                                 | 111, 340 |
| <br><b>Obituary</b>                                                                                                                                                                      |          |
| <b>Østvedt, Ole J.</b> Emmy Egidius (1929–1989) .....                                                                                                                                    | 224      |
| <br><b>Referees for Volume 46</b> .....                                                                                                                                                  | 342      |
| <br><b>Index to Volume 46</b> .....                                                                                                                                                      | 343      |
